# Supplementary material for: Resveratrol attenuates oxidative injury in human umbilical vein endothelial cells through regulating mitochondrial fusion via TyrRS-PARP1 pathway
Source: PubMed Central journal article supplement (PMC6354417; doi:10.1186/s12986-019-0338-7), 2019-01-30

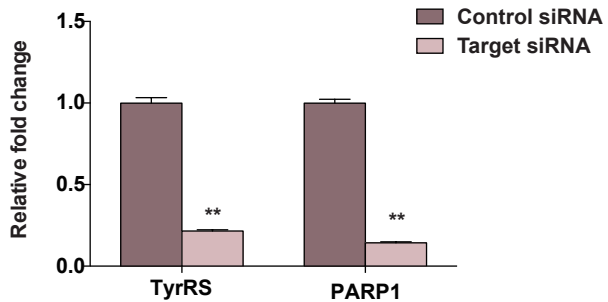

Supplement: 12986_2019_338_MOESM4_ESM.pdf [file 12986_2019_338_MOESM4_ESM.pdf]
